# Supplementary material
Source: Springer Nature journal article supplement (https://www.springermedizin.de/resource/supplementary/12885_2008_1149_MOESM1_ESM.pdf/9471236)
Supplement: MOESM1 [file 9471236]

**1186 Patients referred for colposcopy**

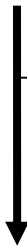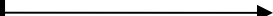

**170 excluded:**

116 not treated

38 ICC

15 treated with hysterectomy

1 prior hysterectomy

**1016 Patients treated with LLETZ**

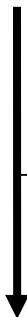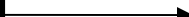

**448 with no follow up data**

420 lost to follow up

25 died (unknown causes)

3 relocated

**575 Patients with follow up cervical smear**
